# Supplementary material for: Rapid Seedless Synthesis of Gold Nanoplates with Microscaled Edge Length in a High Yield and Their Application in SERS
Source: PubMed Central journal article supplement (PMC6223685; doi:10.1007/s40820-016-0092-6), 2016-05-11
Supplement: 40820_2016_92_MOESM1_ESM.pdf [file 40820_2016_92_MOESM1_ESM.pdf]

Supporting Information for

# **Rapid Seedless Synthesis of Gold Nanoplates with Micro-scaled Edge Length in a High Yield and Their Application in SERS**

Sheng Chen<sup>1,2</sup>, Pengyu Xu<sup>1,2</sup>, Yue Li,<sup>1,2</sup> Junfei Xue<sup>1,2</sup>, Song Han<sup>2</sup>, Weihui Ou<sup>2</sup>, Yaping Ding<sup>1</sup>, Weihai Ni<sup>2</sup>. \*

<sup>1</sup>Department of Chemistry, College of Sciences, Shanghai University, Shanghai 200444, People's Republic of China

Sheng Chen, Pengyu Xu, Yue Li, Junfei Xue, Song Han, Weihui Ou, Weihai Ni

<sup>2</sup>Division of i-Lab & Key Laboratory for Nano-Bio Interface Research, Suzhou Institute of Nano-Tech & Nano-Bionics, Chinese Academy of Sciences, Suzhou, Jiangsu 215123, People's Republic of China

\*Corresponding author. E-mail: whni2012@sinano.ac.cn

**Fig. S1** Statistical histogram of the edge length of triangular and hexagonal gold nanoplates

**Fig. S2 a** Extinction spectra of Au products grown at different temperature. The molar ratio of Br<sup>-</sup>/Au is fixed at 6. **b** Those at different molar ratios of Br<sup>-</sup>/Au. The reaction temperature is fixed at 85 °C



Fig. S1



Fig. S2
